# Supplementary material for: The Christian Orthodox Church Fasting Diet Is Associated with Lower Levels of Depression and Anxiety and a Better Cognitive Performance in Middle Life
Source: MDPI journal article supplement (doi:10.3390/nu13020627), 2021-02-15
Supplement: s1 [file s1]

**Table S1.** Fasting Periods and Days According to the Rules of the Christian Orthodox Church.

| Fasting Period/Days                                                                                                                                    | Duration (d/yr)       | Additional dietary restrictions <sup>1</sup>                                                     | Fish Consumption                                                                                |
|--------------------------------------------------------------------------------------------------------------------------------------------------------|-----------------------|--------------------------------------------------------------------------------------------------|-------------------------------------------------------------------------------------------------|
| Lent: 6 weeks before the Holy Week of Easter (i.e., Clean Monday to Saturday of Raising of Lazarus)                                                    | 41                    | Avoidance of oil and wine on all days except weekends and March 9 (holiday of the Forty Martyrs) | Mandatory on March 25 (Annunciation)                                                            |
| Holy Week: Holy Monday to Holy Saturday                                                                                                                | 6                     | Avoidance of oil and wine on all days <sup>2</sup>                                               |                                                                                                 |
| Christmas: November 15 to December 24                                                                                                                  | 40                    | Avoidance of oil and wine on Wednesdays, Fridays, and Christmas Eve                              | Mandatory on November 21 (Presentation of Virgin Mary); allowed from November 22 to December 17 |
| Dormition (or Assumption): August 1 to 14                                                                                                              | 14                    | Avoidance of oil and wine on all days except weekends                                            | Mandatory on August 6 (Christ's Transfiguration)                                                |
| Saint Apostles: <sup>3</sup> Monday after All Saints' Sunday Day to June 28                                                                            | 0 to 30 <sup>4</sup>  | Avoidance of oil and wine on Wednesdays, Fridays, and June 28, unless it falls on a weekend      | Mandatory on June 24 (Nativity of John the Baptist)                                             |
| Important Religious Days: January 5 (Epiphany's Eve), August 29 (Abrupt of John the Baptist's head), September 14 (Exaltation of the Holy Cross)       | 3                     | Avoidance of oil and wine, unless they fall on weekends                                          |                                                                                                 |
| Wednesdays and Fridays: <sup>5</sup> All Wednesdays and Fridays except those included in two periods of no food restriction after Easter and Christmas | 55 to 63 <sup>6</sup> | Avoidance of oil and wine unless they fall on designated holidays                                | Mandatory on Wednesday of Mid-Pentecost and Wednesday of the sixth week after Easter.           |
| Total                                                                                                                                                  | 159-197               |                                                                                                  |                                                                                                 |

<sup>1</sup> In addition to avoidance of foods of animal origin.

<sup>2</sup> Consumption of oil and wine can be tolerated at Holy Thursday's lunch (because oil and wine were consumed at the Last Supper).

<sup>3</sup> So called because it precedes the two apostolic holidays: the feast of Saints Peter and Paul (June 29) and the Council of the Twelve Apostles (June 30).

<sup>4</sup> This varies because its start depends on the mobile feast of Easter. For example, when Easter is celebrated on May 5, the Saint Apostles fasting is not observed.

<sup>5</sup> Strict fasting is preserved as a reminder of the Betrayal (Wednesday) and the Holy Passion of Christ (Friday).

<sup>6</sup> Not counting Wednesdays and Fridays included in all periods described above.

(reproduced with permission from Rodopaos et al 2019 [22])

**Table S2.** Dietary habits of fasters and non-fasters (controls).

| DIETARY HABITS THAT DIFFER BETWEEN THE TWO GROUPS |                                    |                             |
|---------------------------------------------------|------------------------------------|-----------------------------|
| Variable                                          |                                    | P value<br>(Fisher's exact) |
| Meat                                              | Beef (140g)                        | 0.000                       |
|                                                   | Chicken (140g)                     | 0.011                       |
|                                                   | Turkey (30g)                       | 0.002                       |
|                                                   | Broth during cooking               | 0.002                       |
| Eggs                                              |                                    | 0.034                       |
| Dairy products                                    | Full Fat Cheese (30g)              | <0.001                      |
|                                                   | Light Cheese (30g)                 | 0.031                       |
|                                                   | Milk with chocolate                | 0.037                       |
|                                                   | Yogurt Full Fat (Cow) (10%)        | 0.001                       |
|                                                   | Yogurt Light (Cow) (2%)            | 0.001                       |
| Sugar                                             | Marmelade                          | 0.008                       |
|                                                   | Commercial processed juices        | 0.014                       |
|                                                   | Candies                            | 0.003                       |
|                                                   | Refreshments                       | 0.005                       |
| Coffee/Cocoa                                      | Greek, filter, americano, espresso | <0.001                      |
|                                                   | Cocoa (1 tea cup.)                 | 0.014                       |
| Alchool                                           | Whiskey, Gin, Vodka, Tequila       | <0.001                      |
|                                                   | Wine (90ml)                        | 0.018                       |
|                                                   | Raki/Ouzo/Tsipouro                 | <0.001                      |
| Olive oil                                         |                                    | 0.012                       |
| Seefood                                           | Squid, octopus, fish etc (140g)    | <0.001                      |
| Tahini                                            |                                    | <0.001                      |
| Nuts                                              |                                    | 0.019                       |
| Fresh seasonal fruits                             |                                    | 0.041                       |
| Soya                                              |                                    | 0.005                       |
| Peanut Butter                                     |                                    | 0.025                       |
| Halva                                             |                                    | 0.027                       |

CONTROLS

FASTERS

**Table S3.** Frequencies of nutritional intake.

| CONSUMPTION        |                                     | FASTERS | CONTROLS | P      |
|--------------------|-------------------------------------|---------|----------|--------|
|                    |                                     | N=105   | N=107    |        |
| ALCHHOOL           | TYPE OF ALCHHOOL                    |         |          |        |
|                    | Wine (90ml)                         |         |          |        |
|                    | Never/rarely                        | 59%     | 43.9%    | 0.018  |
|                    | 1-3 per month                       | 12.4%   | 17.8%    |        |
|                    | 1-2 per week                        | 22.9%   | 17.8%    |        |
|                    | 3-6 per week                        | 3.8%    | 11.2%    |        |
|                    | Daily                               | 1.9%    | 7.5%     |        |
|                    | More than 2 times per day           | 0%      | 1.9      |        |
|                    | Beer                                |         |          |        |
|                    | Never/rarely                        | 71.4%   | 73.8%    | 0.915  |
|                    | 1-3 per month                       | 16.2%   | 14%      |        |
|                    | 1-2 per week                        | 10.5%   | 9.3%     |        |
|                    | 3-6 per week                        | 1%      | 1.9%     |        |
|                    | Daily                               | 0       | 0.9%     |        |
|                    | More than 2 times per day           | 1%      | 0        |        |
|                    | Raki/Ouzo/ Tsipouro (40ml)          |         |          |        |
|                    | Never/rarely                        | 80%     | 51.4%    | <0.001 |
|                    | 1-3 per month                       | 8.6%    | 25.2%    |        |
|                    | 1-2 per week                        | 7.6%    | 13.1%    |        |
|                    | 3-6 per week                        | 2.9%    | 1.9%     |        |
|                    | Daily                               | 1%      | 6.5%     |        |
|                    | More than 2 times per day           | 0       | 1.9%     |        |
|                    | Whiskey, Gin, Tequila, Vodka (40ml) |         |          |        |
|                    | Never/rarely                        | 99%     | 82.2%    | <0.001 |
|                    | 1-3 per month                       | 1%      | 14%      |        |
|                    | 1-2 per week                        | 0       | 3.7%     |        |
|                    | 3-6 per week                        | 0       | 0        |        |
|                    | Daily                               | 0       | 0        |        |
|                    | More than 2 times per day           | 0       | 0        |        |
| COFFEE             | ANY TYPE                            |         |          |        |
|                    | (1 tea cup)                         |         |          |        |
|                    | Never/rarely                        | 39%     | 19.6%    | <0.001 |
|                    | 1-3 per month                       | 2.9%    | 0%       |        |
|                    | 1-2 per week                        | 5.7%    | 1.9%     |        |
|                    | 3-6 per week                        | 3.8%    | 3.7%     |        |
|                    | Daily                               | 21%     | 20.6%    |        |
|                    | More than 2 times per day           | 27.6%   | 54.2%    |        |
| NUTRITIONAL HABITS |                                     |         |          |        |
| MEAT               | TYPE OF MEAT                        |         |          |        |
|                    | BEEF (140 gr)                       |         |          | <0.001 |

|           |                           |       |       |        |
|-----------|---------------------------|-------|-------|--------|
|           |                           | 21%   | 3.7%  |        |
|           | Never/rarely              | 25.7% | 34.6% |        |
|           | 1-3 per month             | 52.4% | 56.1% |        |
|           | 1-2 per week              | 1%    | 4.7%  |        |
|           | 3-6 per week              | 0     | 0.9%  |        |
|           | Daily                     | 0     | 0     |        |
|           | More than 2 times per day |       |       |        |
|           | Chicken (150 gr)          |       |       |        |
|           | Never/rarely              | 15.2% | 7.5%  |        |
|           | 1-3 per month             | 25.7% | 16.8% |        |
|           | 1-2 per week              | 58.1% | 68.2% | 0.011  |
|           | 3-6 per week              | 1%    | 7.5%  |        |
|           | Daily                     | 0     | 0     |        |
|           | More than 2 times per day | 0     | 0     |        |
| SEAFOOD   | SQUID, OCTAPUS, SHRIMS..  |       |       |        |
|           | (140 gr)                  |       |       |        |
|           | Never/rarely              | 32.4% | 59.8% |        |
|           | 1-3 per month             | 49.5% | 30.8% |        |
|           | 1-2 per week              | 18.1% | 9.3%  | <0.001 |
|           | 3-6 per week              | 0     | 0     |        |
|           | Daily                     | 0     | 0     |        |
|           | More than 2 times per day | 0     | 0     |        |
| CHEESE    | FULL FAT /COW             |       |       |        |
|           | (1 tea cup)               |       |       |        |
|           | Never/rarely              | 3.8%  |       |        |
|           | 1-3 per month             | 1.9%  | 10.3% |        |
|           | 1-2 per week              | 22.9% | 1.9%  |        |
|           | 3-6 per week              | 49.5% | 10.3% |        |
|           | Daily                     | 12.4% | 18.7% | <0.001 |
|           | More than 2 times per day | 9.5%  | 36.4% |        |
|           |                           |       | 22.4% |        |
| YOGURT    | 10% FAT /COW              |       |       |        |
|           | (1 tea cup)               |       |       |        |
|           | Never/rarely              | 64.8% | 66.4% |        |
|           | 1-3 per month             | 7.6%  | 12.1% |        |
|           | 1-2 per week              | 19%   | 4.7%  | 0.001  |
|           | 3-6 per week              | 8.6%  | 11.2% |        |
|           | Daily                     | 0     | 5.6%  |        |
|           | More than 2 times per day | 0     | 0     |        |
| OLIVE OIL |                           |       |       |        |
|           | (5-6 pieces)              |       |       |        |
|           |                           | 10.5% | 1.9%  |        |
|           | Never/rarely              | 1%    | 0.9%  | 0.012  |
|           | 1-3 per month             | 1.9%  | 1.9%  |        |

|                              |                           |       |       |                  |
|------------------------------|---------------------------|-------|-------|------------------|
|                              | 1-2 per week              | 8.6%  | 1.9%  |                  |
|                              | 3-6 per week              | 4.8%  | 7.5%  |                  |
|                              | Daily                     | 73.3% | 86%   |                  |
|                              | More than 2 times per day |       |       |                  |
| <hr/>                        |                           |       |       |                  |
| <b>NUTS</b>                  |                           |       |       |                  |
|                              | (5-6 pieces)              |       |       |                  |
|                              | Never/rarely              | 21.9% | 24.3% |                  |
|                              | 1-3 per month             | 17.1% | 13.1% |                  |
|                              | 1-2 per week              | 35.2% | 21.5% | <b>0.019</b>     |
|                              | 3-6 per week              | 6.7%  | 15.9% |                  |
|                              | Daily                     | 14.3% | 11.2% |                  |
|                              | More than 2 times per day | 4.8%  | 14%   |                  |
| <hr/>                        |                           |       |       |                  |
| <b>SEASONAL FRESH FRUITS</b> |                           |       |       |                  |
|                              | (1 piece)                 |       |       |                  |
|                              | Never/rarely              | 1%    | 0.9%  |                  |
|                              | 1-3 per month             | 0%    | 3.7%  |                  |
|                              | 1-2 per week              | 3.8%  | 11.2% | <b>0.041</b>     |
|                              | 3-6 per week              | 8.6%  | 13.1% |                  |
|                              | Daily                     | 35.2% | 31.8% |                  |
|                              | More than 2 times per day | 51.4% | 39.3% |                  |
| <hr/>                        |                           |       |       |                  |
| <b>TAHINI</b>                |                           |       |       |                  |
|                              | (1 tea cup)               |       |       |                  |
|                              | Never/rarely              | 50.5% | 80.4% |                  |
|                              | 1-3 per month             | 17.1% | 4.7%  |                  |
|                              | 1-2 per week              | 21.9% | 3.7%  | <b>&lt;0.001</b> |
|                              | 3-6 per week              | 7.8%  | 0%    |                  |
|                              | Daily                     | 1.9%  | 11.2% |                  |
|                              | More than 2 times per day | 1%    | 0%    |                  |
| <hr/>                        |                           |       |       |                  |
| <b>SOYA</b>                  |                           |       |       |                  |
|                              | (1 tea cup)               |       |       |                  |
|                              | Never/rarely              | 82.9% | 96.3% |                  |
|                              | 1-3 per month             | 7.6%  | 1.9%  |                  |
|                              | 1-2 per week              | 9.5%  | 1.9%  | <b>0.005</b>     |
|                              | 3-6 per week              | 0     | 0     |                  |
|                              | Daily                     | 0     | 0     |                  |
|                              | More than 2 times per day | 0     | 0     |                  |
| <hr/>                        |                           |       |       |                  |
